# Supplementary material
Source: PubMed Central journal article supplement (PMC7188312)
Supplement: NIHMS1542542-supplement-SupFig1.pdf [file NIHMS1542542-supplement-SupFig1.pdf]

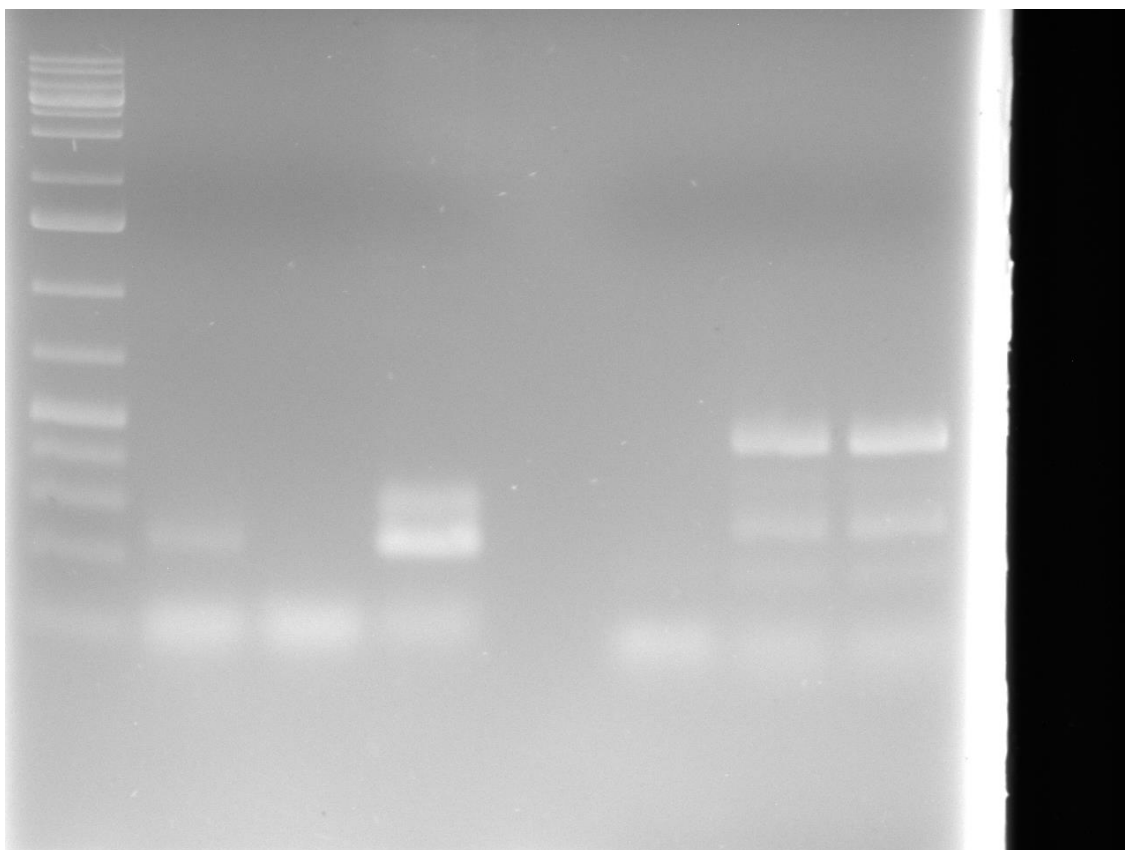

**Supplementary Figure 1** Raw image of the agarose gel confirming the *dar* operon knock out in Extended Data Figure 4c. The 2% agarose gel was run at 100V for 35 min, stained in EtBr and visualised and documented with an Intas UV transilluminator.
