# Supplementary material
Source: PubMed Central journal article supplement (PMC7188312)
Supplement: NIHMS1542542-supplement-SupTable1.pdf [file NIHMS1542542-supplement-SupTable1.pdf]

| Organism and collection number | MIC ( $\mu\text{g ml}^{-1}$ ) |      |
|--------------------------------|-------------------------------|------|
|                                | Dar                           | Gen  |
| <i>E. coli</i>                 |                               |      |
| 1042752                        | 2                             | 1    |
| 1043856 ESBL                   | 2                             | 0.5  |
| 1043982                        | 2                             | 0.5  |
| 1044039                        | 2                             | 0.5  |
| 1044149                        | 2                             | 0.5  |
| 1044592                        | 1                             | 0.5  |
| 1050722                        | 2                             | 0.5  |
| 1051524                        | 1                             | 0.5  |
| 1054759                        | 2                             | 0.5  |
| 1057221                        | 2                             | 0.5  |
| <i>K. pneumoniae</i>           |                               |      |
| 1043979                        | 2                             | 0.25 |
| 1044560                        | 2                             | 0.12 |
| 1048980                        | 2                             | 0.25 |
| 1050083                        | 2                             | 0.25 |
| 1052654 ESBL                   | 2                             | 0.25 |
| 1054793                        | 2                             | 0.25 |
| 1059629                        | 2                             | 0.25 |
| 1060478                        | 2                             | 0.25 |
| 1061011                        | 2                             | 0.25 |
| 1062519                        | 2                             | 0.25 |
| <i>P. aeruginosa</i>           |                               |      |
| 1042656                        | 32                            | 2    |
| 1045324                        | 16                            | 2    |
| 1046894                        | 16                            | 1    |
| 1048897                        | 16                            | 1    |
| 1055685                        | 16                            | 1    |
| 1055981                        | 32                            | 2    |
| 1059537                        | 16                            | 2    |
| 1060916                        | 16                            | 1    |
| 1065385                        | 16                            | 1    |
| 1065788                        | 16                            | 0.06 |

Supplementary Table 1 Potency of darobactin against recent clinical isolates. The clinical isolate collection of JMI laboratories was used for this study. Dar; darobactin, Gen; gentamicin.
